# Supplementary material
Source: Springer Nature journal article supplement (https://www.springermedizin.de/resource/supplementary/13063_2007_209_MOESM1_ESM.pdf/9622298)
Supplement: MOESM1 [file 9622298]

## SET-UP

Gaining Prestige  
and Building  
Robust Systems

## MARKET PLANNING

Segmenting Markets  
and Devising The  
Marketing Story

## SIGNALING

Conveying The  
Message and Enrolling  
Patrons and Sponsors

## LEARNING

Developing Market  
Knowledge and  
Redirecting Strategy

## REINFORCING

Maintaining and  
Renewing  
Commitment
